# Supplementary material for: Depletion of atmospheric gaseous elemental mercury by plant uptake at Mt. Changbai, Northeast China
Source: Copernicus journal article supplement (doi:10.5194/acp-2016-391), 2016-07-01
Supplement: Supplementary file 1 [file acp-2016-391-supplement.pdf]

1 Supporting Information:

2 Depletion of atmospheric gaseous elemental mercury by plant  
3 uptake at Mt. Changbai, Northeast China

4 Xuewu Fu<sup>1</sup>, Wei Zhu<sup>1</sup>, Hui Zhang<sup>1</sup>, Jonas Sommar<sup>1</sup>, Xu Yang<sup>1</sup>, Xun Wang<sup>1,2</sup>, Che-Jen Lin<sup>1,3,4</sup>, Xinbin Feng<sup>1,\*</sup>

5 <sup>1</sup>State Key Laboratory of Environmental Geochemistry, Institute of Geochemistry, Chinese Academy of  
6 Sciences, 99 Lincheng West Road, Guiyang, 550081, China

7 <sup>2</sup>University of the Chinese Academy of Sciences, Beijing 100049, China

8 <sup>3</sup>Department of Civil and Environmental Engineering, Lamar University, Beaumont, Texas 77710, United States

9 <sup>4</sup>Center for Advances in Water and Air Quality, Lamar University, Beaumont, Texas 77710, United States

10

11 Correspondence to: Xinbin Feng ([fengxinbin@vip.skleg.cn](mailto:fengxinbin@vip.skleg.cn))

12

|    |                                                                                  |              |
|----|----------------------------------------------------------------------------------|--------------|
| 13 | 1 Supplementary Text.....                                                        | Page S1      |
| 14 | 1.1 Nocturnal boundary layer.....                                                | Page S1      |
| 15 | 1.2 Simulations of atmospheric GEM at Mt. Changbai forest using a box model..... | Page S1      |
| 16 | 1.3 The turbulent diffusivity (Kc).....                                          | Page S2      |
| 17 | Figure S1.....                                                                   | Page S3      |
| 18 | Figure S2.....                                                                   | Page S4      |
| 19 | Figure S3.....                                                                   | Page S5      |
| 20 | Figure S4.....                                                                   | Page S6      |
| 21 | Figure S5.....                                                                   | Page S7      |
| 22 | Figure S6.....                                                                   | Page S8      |
| 23 | Figure S7.....                                                                   | Page S9      |
| 24 | Table S1 .....                                                                   | Page S10     |
| 25 | Table S2 .....                                                                   | Page S11     |
| 26 | Table S3 .....                                                                   | Page S12     |
| 27 | Table S4 .....                                                                   | Page S13     |
| 28 | Table S5 .....                                                                   | Page S14     |
| 29 | Reference.....                                                                   | Page S15-S17 |

## 30 **1 Supplementary Text**

### 31 **1.1 Nocturnal boundary layer**

32 The Nocturnal boundary layer (NBL) was calculated by Weather Research and  
33 Forecasting Model (WRF) 3.5 with two-way nested runs. The spatial resolution for  
34 course domain is 30 km with 100×100 grid cells, and for the nested domain is 10 km  
35 with 30×30 grid cells. As our studied site is 100-200 km away from Sea of Japan, we  
36 chose the MYJ scheme for NBL as earlier studies suggested that MYJ scheme was as  
37 first choice for marine atmospheric boundary layer simulations without *a*  
38 *priori* information of atmospheric stability in the region of interest (Huang et al.,  
39 2013;Krogsaeter and Reuder, 2015). For other parameterizations, we selected Kain  
40 and Fritsch cumulus scheme for cumulus parameterization, Lin (Purdue) scheme for  
41 microphysics options RRTM scheme for Radiation Physics Options.

42

43

### 44 **1.2 Simulations of atmospheric GEM at Mt. Changbai forest using a box model**

45 A box model was applied to estimate the GEM concentration at the height of 24  
46 m agl. Based on the measured characteristics of the GEM depletion events, the  
47 model assumes that vegetative uptake (in terms of dry deposition flux) is the only  
48 pathway for the GEM removal and chemical transformation is not included in the box  
49 modeling. A sensitivity analysis was performed on three parameters: (1) dry  
50 deposition flux (0-10 ng m<sup>-2</sup> h<sup>-1</sup>, the range of measured deposition flux using flux  
51 bags), (2) turbulent diffusivity of the atmosphere (0.1-10 cm s<sup>-1</sup>, typical value under  
52 low wind condition), and (3) a typical nocturnal boundary layer height (100 m agl).  
53 GEM concentration above the stable nocturnal boundary layer was assigned to 1.56  
54 ng m<sup>-3</sup>, the mean observed at 45 m during daytime when the vertical mixing is strong.  
55 The flux of vegetative uptake ( $F_C$ ) and the resulted concentration gradient was  
56 calculated based on the on the algorithm:

$$F_C^{AGM} = - \frac{\kappa \cdot u_*}{\underbrace{\Phi_H(\zeta_1)}_{K_C}} \cdot \frac{\partial C}{\partial \ln(z)} \quad (1)$$

57

58 where  $k$  is von Kármán constant ( $\sim 0.41$ ),  $u_*$  is the friction velocity (m s<sup>-1</sup>),  $\Psi_H(\zeta_1)$  is  
59 the integrated universal function for sensible heat to correct for deviations from the  
60 ideal logarithmic profile,  $K_C$  term is the turbulent diffusivity (m s<sup>-1</sup>),  $C$  is the

61 concentration parameter for GEM concentration ( $\text{ng m}^{-3}$ ),  $z$  is the height parameter  
 62 (m).

63

### 64 **1.3 The turbulent diffusivity ( $K_C$ )**

65 The flux-gradient approach (Kaimal and Finnigan, 1994) expresses a scalar flux ( $F$ , e.g.  
 66  $\text{ng m}^{-2} \text{s}^{-1}$ ) as the product between the turbulent diffusivity ( $K_C$ ,  $\text{m}^2 \text{s}^{-1}$ ) and a concentration  
 67 gradient ( $\partial c/\partial z$ ,  $\text{ng m}^{-4}$ ) assuming that measurements are made within a vertical layer of  
 68 constant flux that forms over homogeneous terrain:

$$69 \quad F = -K_C \cdot \frac{\partial c}{\partial z} = -\frac{u_* \cdot \kappa \cdot (z-d)}{\phi_H(\varsigma)} \cdot \frac{\partial c}{\partial z} = -\frac{u_* \cdot \kappa}{\phi_H(\varsigma)} \cdot \frac{\partial c}{\partial \ln z} \quad (2),$$

70 where,  $u_*$  is the friction velocity ( $\text{m s}^{-1}$ ),  $\kappa$  is the von Kármán constant (taken as 0.4),  
 71  $\phi_H(\varsigma)$  is the diabatic influence function for heat (parameterized as a function of  
 72  $\varsigma = (z-d)/L$ , where  $L$  is the Obukhov length), whereas  $z$  and  $d$  are the  
 73 measurement and (canopy) displacement height (m) respectively. An empirical form of  
 74  $\phi_H(\varsigma)$  is  $0.95/\sqrt{|1-11.6\varsigma|}$  and  $0.95 + 7.8\varsigma$  for unstable ( $\varsigma < 0$ ) and stable ( $2 > \varsigma \geq 0$ )  
 75 atmospheric conditions respectively (Foken, 2008).

76

77 For flux-gradient measurements made within the roughness sublayer above the canopy  
 78 height (i.e.  $h_{canopy} < z < z_*$ ), Eq. 1 is not valid (*underestimates* the magnitude of scalar  
 79 flux) and requires further correction following e.g. Garratt (Garratt, 1992) and Simpson et al.  
 80 (Simpson et al., 1998):

$$81 \quad F = -\frac{u_* \cdot \kappa \cdot (z-d)}{\phi_h(\varsigma) \cdot \phi_*(z/z_*)} \cdot \frac{\partial c}{\partial z} \quad (3)$$

82 In contrast to  $\phi_H(\varsigma)$ , the additional correction function  $\phi_*(z/z_*)$  in Eq. 2 is independent of  
 83 stability. A common type of parameterization for  $\phi_*$  is  $\exp\left[-0.7\left(1 - \frac{z}{z_*}\right)\right]$  (Garratt, 1992).

84 In-turn, the upper limit of the roughness sublayer ( $z_*$ ) can be estimated by  $2 \cdot h_{canopy} - d$   
 85 (Raupach, 1994).

86

87 | Figure S1. Map showing the location of Mt. Changbai forest and coal fired power plants in  
88 | Northeast Asia.

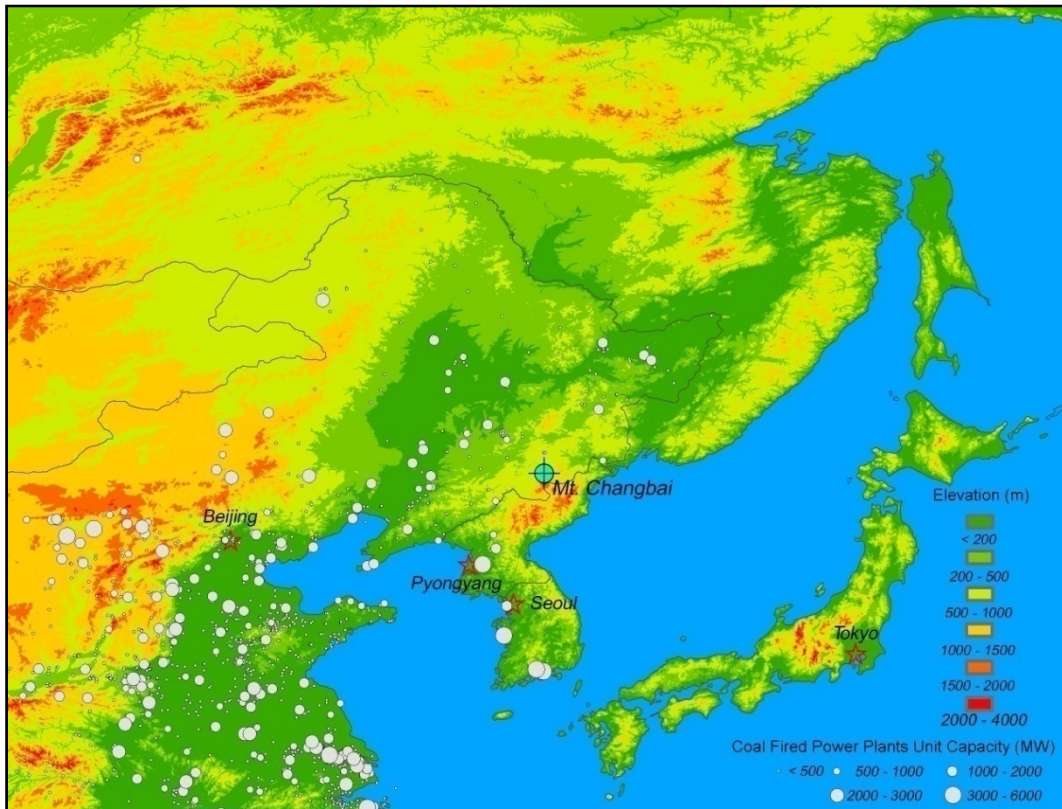

89  
90  
91  
92

93 | Figure S2. GEM at 4 m agl in the clear spot measured by the Tekran speciation unit, 24 m agl (~3  
94 | m above forest canopy, long-term GEM sampling site) and 45 m agl (~24 m above forest  
95 | canopy) measured by the Tekran 2537 from 10 to 14 July 2013.

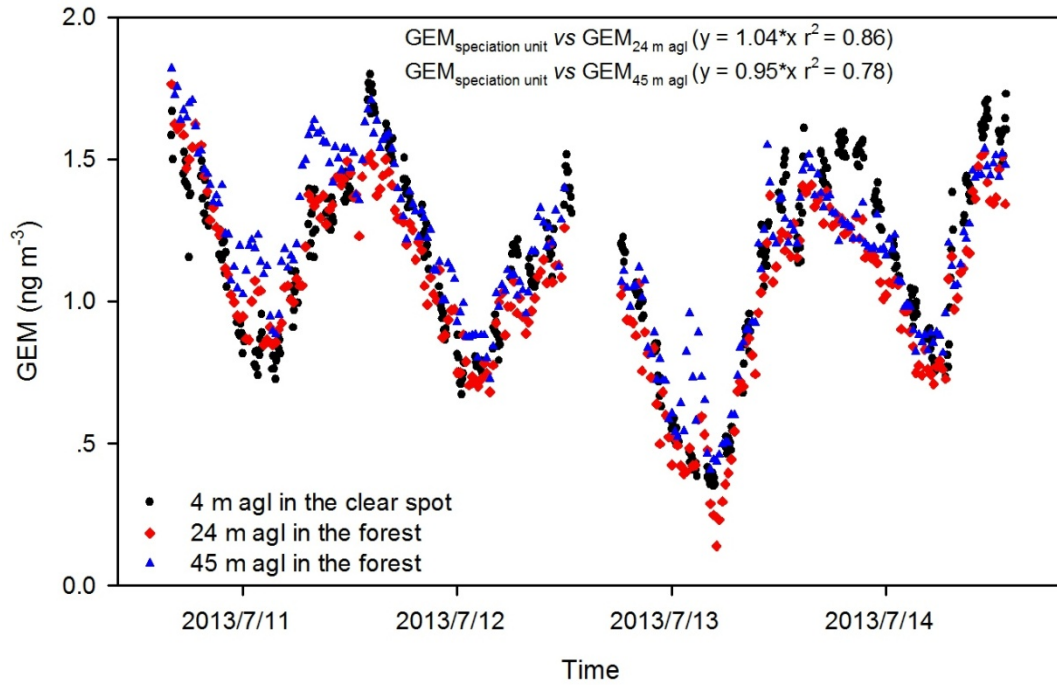

96  
97  
98  
99

100 | Figure S3. Time series of soil/air GEM flux and meteorological parameters in Mt. Changbai forest  
101 | in July 2013.

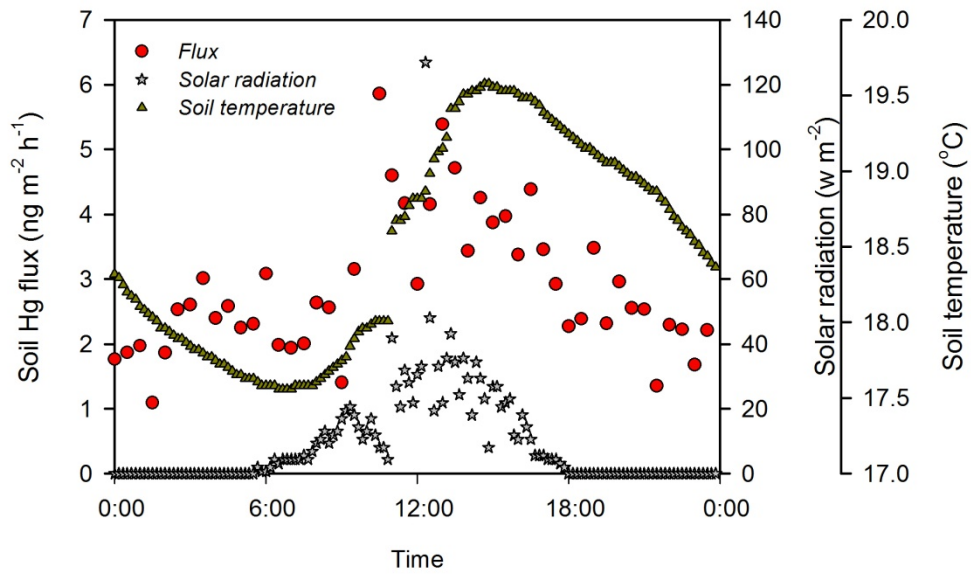

102

103

104

105

106 | Figure S4. Diurnal trends in vertical gradient of GEM concentrations between the height of 45-24  
107 | m, 24-10 m and 10-1m in Mt. Changbai forest from 10 to 15 July 2013.

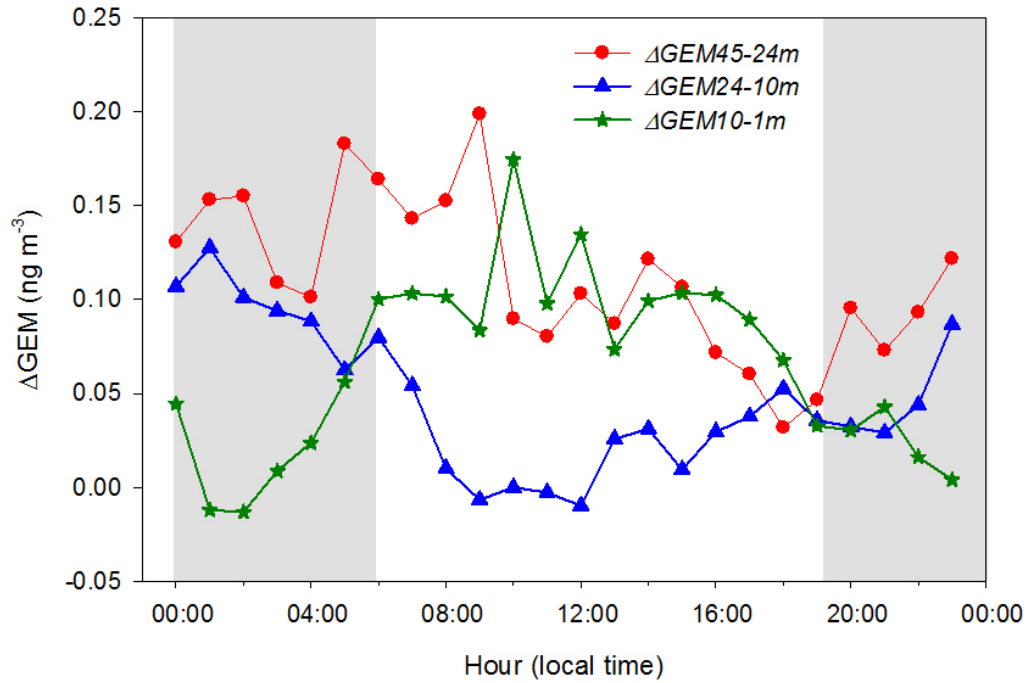

108  
109  
110  
111

112 | Figure S5. Diurnal variations of air temperature (A), wind speed (B), relative humidity (RH, C)  
113 | and ozone concentrations (D) in Mt. Changbai forest in leaf-growing season from October 2008 to  
114 | December 2014.

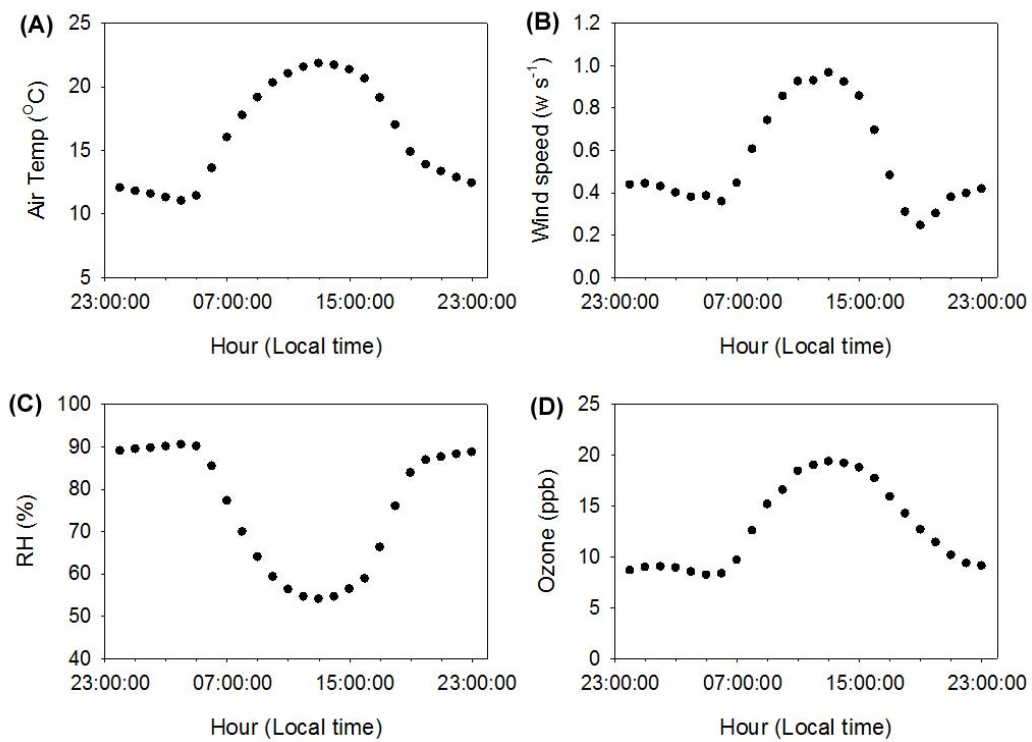

115

116

117

118



119 | Figure S6. Temporal variation of the turbulent diffusivity at Mt. Changbai forest from 10 to 19  
120 | July 2013

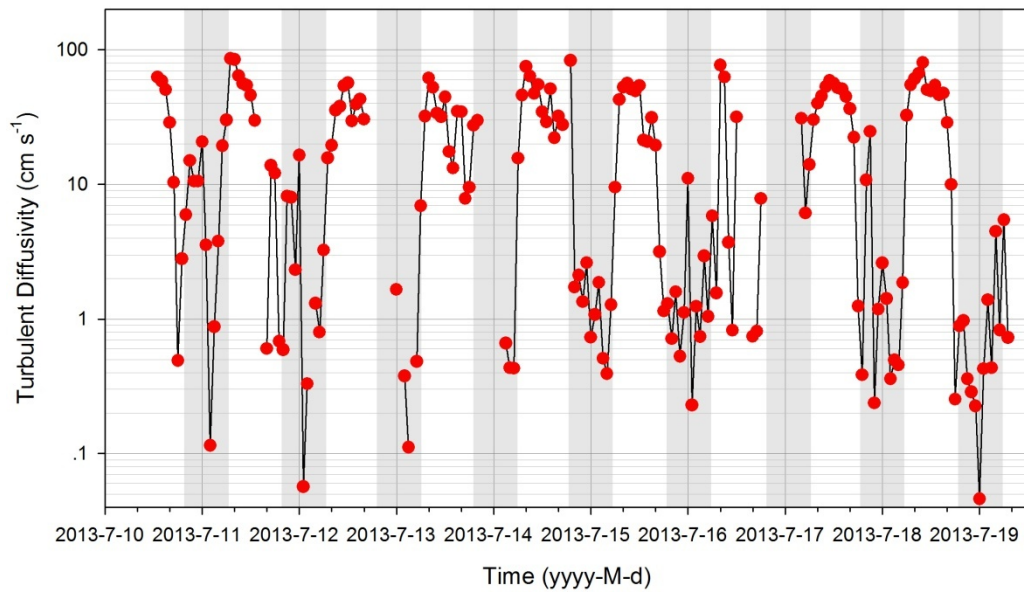

121  
122  
123  
124

125 | Figure S7. Wind frequency distributions in leaf-growing season and non-leaf-growing season from  
 126 | Aug 2009 to Jul 2013 (A), monthly mean wind speed from Aug 2009 to Jul 2013 (B), and Leaf  
 127 | areas index in leaf-growing season during 2003-2005(C) (Shi et al., 2008).

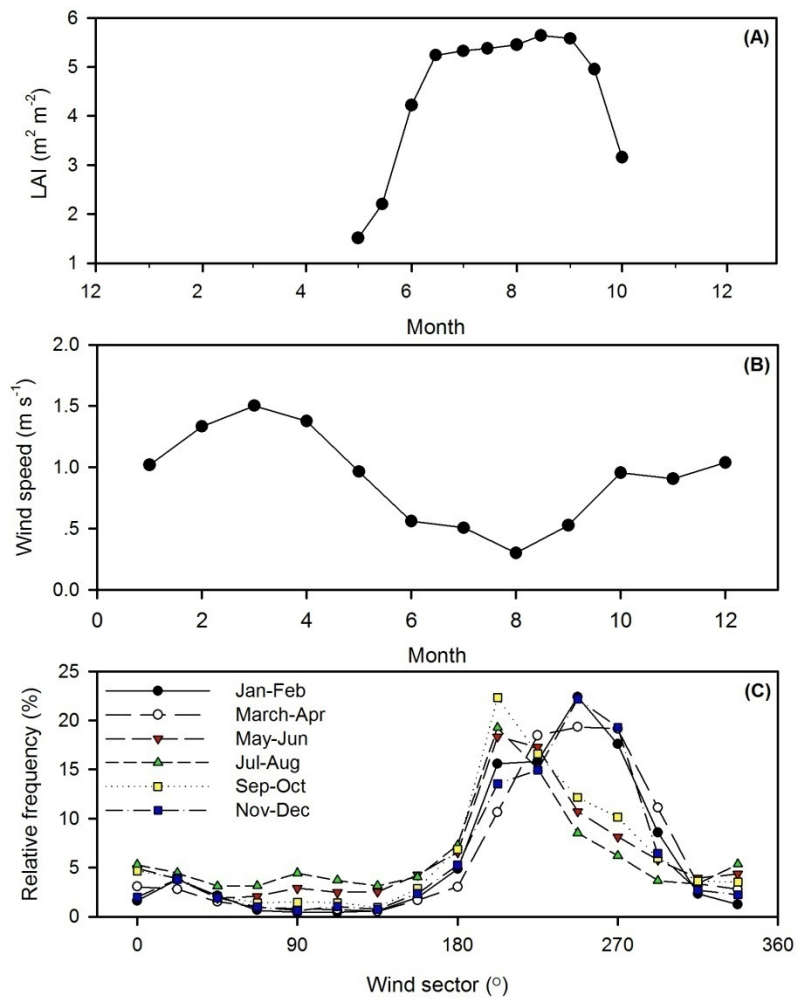

128

129

Table S1. Statistical summary of litterfall Hg concentrations and litter mass in Mt. Changbai forest

| Litterfall collection site | Time    | Species                         | Concentration (ng g <sup>-1</sup> ) | Litter mass (g m <sup>-2</sup> ) | Mass-weight concentration (ng g <sup>-1</sup> ) |  |
|----------------------------|---------|---------------------------------|-------------------------------------|----------------------------------|-------------------------------------------------|--|
| Collector-1                | 2013-09 | <i>Pinus koraiensis</i>         | 44.5                                | 51.70                            | 74.8                                            |  |
|                            |         | <i>Acer pseudo-sieboldianum</i> | 138.5                               | 24.95                            |                                                 |  |
|                            |         | <i>Quercus mongolica</i>        | 170.4                               | 35.60                            |                                                 |  |
|                            |         | <i>Fraxinus mandshurica</i>     | 44.5                                | 51.70                            |                                                 |  |
|                            |         | <i>Tilia amurensis</i>          | 138.5                               | 24.95                            |                                                 |  |
|                            |         | <i>Others</i>                   | 170.4                               | 35.60                            |                                                 |  |
| Collector-1                | 2013-10 | <i>Acer mono</i>                | 60.2                                | 1.8                              | 60.2                                            |  |
| Collector-2                | 2013-09 | <i>Pinus koraiensis</i>         | 40.4                                | 6.48                             | 39.7                                            |  |
|                            |         | <i>Acer pseudo-sieboldianum</i> | 46.8                                | 5.38                             |                                                 |  |
|                            |         | <i>Quercus mongolica</i>        | 31.2                                | 9.49                             |                                                 |  |
|                            |         | <i>Acer mono</i>                | 58.0                                | 4.81                             |                                                 |  |
|                            |         | <i>Fraxinus mandshurica</i>     | 34.5                                | 18.54                            |                                                 |  |
|                            |         | <i>Tilia amurensis</i>          | 45.7                                | 52.12                            |                                                 |  |
| Collector-2                | 2013-10 | <i>Pinus koraiensis</i>         | 34.1                                | 4.4                              | 53.3                                            |  |
|                            |         | <i>Quercus mongolica</i>        | 30.3                                | 8.8                              |                                                 |  |
|                            |         | <i>Acer mono</i>                | 70.7                                | 5.8                              |                                                 |  |
|                            |         | <i>Others</i>                   | 81.3                                | 6.6                              |                                                 |  |
| Collector-3                | 2013-09 | <i>Acer ginnala Maxim</i>       | 38.1                                | 5.8                              | 31.1                                            |  |
|                            |         | <i>Pinus koraiensis</i>         | 29.4                                | 19.0                             |                                                 |  |
|                            |         | <i>Acer pseudo-sieboldianum</i> | 49.6                                | 4.6                              |                                                 |  |
|                            |         | <i>Quercus mongolica</i>        | 32.5                                | 10.8                             |                                                 |  |
|                            |         | <i>Acer mono</i>                | 46.9                                | 6.0                              |                                                 |  |
|                            |         | <i>Fraxinus mandshurica</i>     | 23.4                                | 1.5                              |                                                 |  |
|                            |         | <i>Tilia amurensis</i>          | 40.4                                | 19.6                             |                                                 |  |
| Collector-3                | 2013-10 | <i>Pinus koraiensis</i>         | 21.7                                | 1.5                              | 35.8                                            |  |
|                            |         | <i>Quercus mongolica</i>        | 42.3                                | 3.2                              |                                                 |  |
| Collector-4                | 2013-09 | <i>Pinus koraiensis</i>         | 31.4                                | 70.6                             | 34.2                                            |  |
|                            |         | <i>Acer pseudo-sieboldianum</i> | 47.4                                | 2.7                              |                                                 |  |
|                            |         | <i>Quercus mongolica</i>        | 26.3                                | 4.1                              |                                                 |  |
|                            |         | <i>Acer mono</i>                | 50.9                                | 15.5                             |                                                 |  |
|                            |         | <i>Tilia amurensis</i>          | 43.0                                | 11.8                             |                                                 |  |
| Collector-4                | 2013-10 | <i>Others</i>                   | 32.8                                | 121.1                            | 64.4                                            |  |
|                            |         | <i>Pinus koraiensis</i>         | 40.1                                | 19.4                             |                                                 |  |
|                            |         | <i>Quercus mongolica</i>        | 46.0                                | 21.7                             |                                                 |  |
|                            |         |                                 | <i>Others</i>                       | 100.9                            | 23.9                                            |  |
| <b>Overall mean</b>        |         |                                 |                                     |                                  | <b>43.0±29.5</b>                                |  |

132 Table S2. Concentration of atmospheric speciated Hg (GEM, PBM, and GOM) and isotopic

133 composition of atmospheric GEM at Mt. Changbai forest

| Sample ID | Sampling period                 | GEM conc.          | PBM conc.          | GOM conc.          | $\delta^{202}\text{Hg}$ | $\delta^{202}\text{Hg}$ | $\Delta^{199}\text{Hg}$ | $\Delta^{199}\text{Hg}$ | $\Delta^{200}\text{Hg}$ | $\Delta^{200}\text{Hg}$ | $\Delta^{201}\text{Hg}$ | $\Delta^{201}\text{Hg}$ |
|-----------|---------------------------------|--------------------|--------------------|--------------------|-------------------------|-------------------------|-------------------------|-------------------------|-------------------------|-------------------------|-------------------------|-------------------------|
|           |                                 | ng m <sup>-3</sup> | pg m <sup>-3</sup> | pg m <sup>-3</sup> | ‰                       | 2 $\sigma$ , ‰          |
| GEM-1     | 2013/7/8 13:40-2013/7/9 15:30   | 1.60               | 2                  | 4                  | -0.06                   | 0.09                    | -0.05                   | 0.04                    | 0.01                    | 0.04                    | -0.01                   | 0.06                    |
| GEM-2     | 2013/7/9 15:30-2013/7/10 15:30  | 1.46               | 2                  | 2                  | 0.35                    | 0.09                    | -0.05                   | 0.04                    | -0.04                   | 0.04                    | -0.12                   | 0.06                    |
| GEM-3     | 2013/7/10 15:30-2013/7/11 15:45 | 1.23               | 4                  | 2                  | 0.61                    | 0.09                    | -0.09                   | 0.04                    | -0.05                   | 0.04                    | -0.08                   | 0.06                    |
| GEM-4     | 2013/7/11 15:45-2013/7/12 15:50 | 1.14               | 5                  | 2                  | 0.80                    | 0.09                    | -0.08                   | 0.04                    | -0.03                   | 0.04                    | -0.06                   | 0.06                    |
| GEM-5     | 2013/7/12 15:50-2013/7/13 16:00 | 0.91               | 6                  | 1                  | 0.91                    | 0.09                    | -0.06                   | 0.04                    | -0.04                   | 0.04                    | -0.07                   | 0.06                    |
| GEM-6     | 2013/7/13 16:00-2013/7/14 15:40 | 1.32               | 4                  | 2                  | 0.58                    | 0.09                    | -0.06                   | 0.04                    | -0.06                   | 0.04                    | -0.05                   | 0.06                    |
| GEM-7     | 2013/7/14 15:40-2013/7/15 17:10 | 1.37               | 2                  | 2                  | 0.58                    | 0.09                    | -0.08                   | 0.04                    | -0.05                   | 0.04                    | -0.04                   | 0.06                    |
| GEM-8     | 2013/7/15 17:15-2013/7/16 17:30 | 1.24               | 2                  | 2                  | 0.08                    | 0.09                    | -0.04                   | 0.04                    | -0.04                   | 0.04                    | -0.04                   | 0.06                    |
| GEM-9     | 2013/7/16 17:30-2013/7/17 18:10 | 1.57               | 5                  | 1                  | -0.34                   | 0.09                    | -0.11                   | 0.04                    | -0.04                   | 0.04                    | -0.06                   | 0.06                    |
| GEM-10    | 2013/7/17 18:10-2013/7/18 18:35 | 1.30               | 8                  | 1                  | -0.01                   | 0.09                    | -0.08                   | 0.04                    | -0.05                   | 0.04                    | -0.04                   | 0.06                    |

134

135

136 Table S3. A statistical summary of reported litterfall Hg deposition fluxes and estimated annual  
 137 litterfall Hg deposition of Hg over the world.

| Region                    | Litterfall Hg deposition flux<br>( $\mu\text{g m}^{-2} \text{yr}^{-1}$ ) |                 |                 | Forest area<br>( $\text{km}^2$ ) | Estimated litterfall<br>deposition<br>( $\text{Mg yr}^{-1}$ ) | Reference                                                                                                                                                                                                                     |
|---------------------------|--------------------------------------------------------------------------|-----------------|-----------------|----------------------------------|---------------------------------------------------------------|-------------------------------------------------------------------------------------------------------------------------------------------------------------------------------------------------------------------------------|
|                           | Range                                                                    | Median          | N               |                                  |                                                               |                                                                                                                                                                                                                               |
|                           | Asia                                                                     | 20.9-220        | 37.5 $\pm$ 76.1 |                                  |                                                               |                                                                                                                                                                                                                               |
| North America             | 3.8-30.9                                                                 | 13.9 $\pm$ 5.6  | 47              | 6,847,010                        | 95                                                            | (Lindberg, 1996;Rea et al., 1996;Grigal et al., 2000;St Louis et al., 2001;Sheehan et al., 2006;Demers et al., 2007;Bushey et al., 2008;Fisher and Wolfe, 2012;Juillerat et al., 2012;Risch et al., 2012;Benoit et al., 2013) |
| Europe (including Russia) | 2.7-25.2                                                                 | 14.2 $\pm$ 8.9  | 6               | 10,156,300                       | 144                                                           | (Iverfeldt, 1991;Munthe et al., 1995;Lee et al., 2000;Schwesig and Matzner, 2000;Lindberg et al., 2007;Larssen et al., 2008)                                                                                                  |
| South America             | 43.0-184                                                                 | 60.0 $\pm$ 49.0 | 9               | 9,436,410                        | 566                                                           | (Roulet et al., 1998;Fostier et al., 2003;Mélières et al., 2003;Silva-Filho et al., 2006;Teixeira et al., 2012)                                                                                                               |
| Africa                    |                                                                          |                 |                 | 6,164,310                        | 159*                                                          | Lack of observational data                                                                                                                                                                                                    |
| Oceania                   |                                                                          |                 |                 | 1,951,370                        | 50*                                                           | Lack of observational data                                                                                                                                                                                                    |
| <b>Global total</b>       |                                                                          |                 |                 |                                  | <b>1232</b>                                                   |                                                                                                                                                                                                                               |

138 (Estimated litterfall deposition: \* indicates the values were calculated using the global median litterfall Hg deposition flux and the forest  
 139 area in these regions)

140

141

142 Table S4. A statistical summary of reported throughfall Hg deposition fluxes and estimated annual  
 143 throughfall Hg deposition of Hg over the world

| Region                    | Throughfall Hg deposition flux<br>( $\mu\text{g m}^{-2} \text{ yr}^{-1}$ ) |           |           | Forest area<br>( $\text{km}^2$ ) | Estimated throughfall<br>deposition ( $\text{mg yr}^{-1}$ ) | Reference                                                                                                                                       |
|---------------------------|----------------------------------------------------------------------------|-----------|-----------|----------------------------------|-------------------------------------------------------------|-------------------------------------------------------------------------------------------------------------------------------------------------|
|                           | Range                                                                      | Median    | N         |                                  |                                                             |                                                                                                                                                 |
|                           | Asia                                                                       | 10.5-71.3 | 36.8±29.9 |                                  |                                                             |                                                                                                                                                 |
| North America             | 3.8-30.9                                                                   | 11.8±3.3  | 10        | 6,847,010                        | 81                                                          | (Lindberg, 1996; Rea et al., 1996; Grigal et al., 2000; St Louis et al., 2001; Sheehan et al., 2006; Choi et al., 2008; Fisher and Wolfe, 2012) |
| Europe (including Russia) | 6.8-39.0                                                                   | 15.2±10.7 | 8         | 10,156,300                       | 154                                                         | (Iverfeldt, 1991; Munthe et al., 1995; Lee et al., 2000; Schwesig and Matzner, 2000; Lindberg et al., 2007; Larssen et al., 2008)               |
| South America             | 72                                                                         | 72        | 1         | 9,436,410                        | 679                                                         | (Fostier et al., 2000)                                                                                                                          |
| Africa                    |                                                                            |           |           | 6,164,310                        | 160*                                                        | Lack of observational data                                                                                                                      |
| Oceania                   |                                                                            |           |           | 1,951,370                        | 51*                                                         | Lack of observational data                                                                                                                      |
| <b>Global total</b>       |                                                                            |           |           |                                  | <b>1338</b>                                                 |                                                                                                                                                 |

144 (Estimated throughfall deposition: \* indicates the values were calculated using the global median throughfall Hg deposition flux and the  
 145 forest area in these regions)

146

147

148

149 Table S5. A statistical summary of reported forest soil emission fluxes and estimated annual forest  
 150 soil emission fluxes over the world  
 151

| Region                    | Forest soil Hg emission flux<br>( $\mu\text{g m}^{-2} \text{ yr}^{-1}$ ) |          |           | Forest area<br>( $\text{km}^2$ ) | Estimated forest soil<br>emission ( $\text{Mg yr}^{-1}$ ) | Reference                                                                                                                                                                              |
|---------------------------|--------------------------------------------------------------------------|----------|-----------|----------------------------------|-----------------------------------------------------------|----------------------------------------------------------------------------------------------------------------------------------------------------------------------------------------|
|                           | Range                                                                    | Median   | N         |                                  |                                                           |                                                                                                                                                                                        |
|                           | Asia                                                                     | 3.3-81.2 | 30.4±23.5 |                                  |                                                           |                                                                                                                                                                                        |
| North America             | -1.3-45.9                                                                | 9.2±11.4 | 15        | 6,847,010                        | 63                                                        | (Carpi and Lindberg, 1998;Poissant and Casimir, 1998;Zhang et al., 2001;Nacht and Gustin, 2004;Schroeder et al., 2005;Kuiken et al., 2008a;Kuiken et al., 2008b;Choi and Holsen, 2009) |
| Europe (including Russia) | -0.1-9.6                                                                 | 2.4±4.3  | 4         | 10,156,300                       | 24                                                        | (Schroeder et al., 1989;Xiao et al., 1991;Ferrara et al., 1997;Lindberg et al., 1998)                                                                                                  |
| South America             | 6.0                                                                      | 6.0      | 1         | 9,436,410                        | 57                                                        | (Carpi et al., 2014)                                                                                                                                                                   |
| Africa                    |                                                                          |          |           | 6,164,310                        | 47*                                                       | Lack of observational data                                                                                                                                                             |
| Oceania                   |                                                                          |          |           | 1,951,370                        | 15*                                                       | Lack of observational data                                                                                                                                                             |
| <b>Global total</b>       |                                                                          |          |           |                                  | <b>381</b>                                                |                                                                                                                                                                                        |

152 (Estimated forest soil emission: \* indicates the values were calculated using the global median forest soil Hg emission flux and the forest  
 153 area in these regions)

154  
 155  
 156

157 **Reference:**

- 158 Benoit, J. M., Cato, D. A., Denison, K. C., and Moreira, A. E.: Seasonal Mercury Dynamics in a New  
159 England Vernal Pool, *Wetlands*, 33, 887-894, DOI 10.1007/s13157-013-0447-4, 2013.
- 160 Bushey, J. T., Nallana, A. G., Montesdeoca, M. R., and Driscoll, C. T.: Mercury dynamics of a northern  
161 hardwood canopy, *Atmos Environ*, 42, 6905-6914, DOI 10.1016/j.atmosenv.2008.05.043, 2008.
- 162 Carpi, A., and Lindberg, S. E.: Application of a Teflon (TM) dynamic flux chamber for quantifying soil  
163 mercury flux: Tests and results over background soil, *Atmos Environ*, 32, 873-882, Doi  
164 10.1016/S1352-2310(97)00133-7, 1998.
- 165 Carpi, A., Fostier, A. H., Orta, O. R., dos Santos, J. C., and Gittings, M.: Gaseous mercury emissions  
166 from soil following forest loss and land use changes: Field experiments in the United States and Brazil,  
167 *Atmos Environ*, 96, 423-429, DOI 10.1016/j.atmosenv.2014.08.004, 2014.
- 168 Choi, H. D., Sharac, T. J., and Holsen, T. M.: Mercury deposition in the Adirondacks: A comparison  
169 between precipitation and throughfall, *Atmos Environ*, 42, 1818-1827, DOI  
170 10.1016/j.atmosenv.2007.11.036, 2008.
- 171 Choi, H. D., and Holsen, T. M.: Gaseous mercury fluxes from the forest floor of the Adirondacks,  
172 *Environ Pollut*, 157, 592-600, DOI 10.1016/j.envpol.2008.08.020, 2009.
- 173 Demers, J. D., Driscoll, C. T., Fahey, T. J., and Yavitt, J. B.: Mercury cycling in litter and soil in  
174 different forest types in the Adirondack region, New York, USA, *Ecol Appl*, 17, 1341-1351, Doi  
175 10.1890/06-1697.1, 2007.
- 176 Ferrara, R., Maserti, B. E., Andersson, M., Edner, H., Ragnarson, P., and Svanberg, S.: Mercury  
177 degassing rate from mineralized areas in the Mediterranean basin, *Water Air Soil Poll*, 93, 59-66, Doi  
178 10.1023/A:1022107205659, 1997.
- 179 Fisher, L. S., and Wolfe, M. H.: Examination of mercury inputs by throughfall and litterfall in the Great  
180 Smoky Mountains National Park, *Atmos Environ*, 47, 554-559, DOI 10.1016/j.atmosenv.2011.10.017,  
181 2012.
- 182 Foken, T.: *Micrometeorology*, Springer-Verlag, Berlin, Heidelberg, 2008.
- 183 Fostier, A. H., Forti, M. C., Guimaraes, J. R. D., Melfi, A. J., Boulet, R., Santo, C. M. E., and Krug, F.  
184 J.: Mercury fluxes in a natural forested Amazonian catchment (Serra do Navio, Amapa State, Brazil),  
185 *Sci Total Environ*, 260, 201-211, Doi 10.1016/S0048-9697(00)00564-7, 2000.
- 186 Fostier, A. H., Cecon, K., and Forti, M. C.: Urban influence on litterfall trace metals fluxes in the  
187 Atlantic forest of Sao Paulo (Brazil), *J Phys Iv*, 107, 491-494, Doi 10.1051/Jp4:20030348, 2003.
- 188 Fu, X., Feng, X., Zhu, W., Rothenberg, S., Yao, H., and Zhang, H.: Elevated atmospheric deposition  
189 and dynamics of mercury in a remote upland forest of southwestern China, *Environ Pollut*, 158,  
190 2324-2333, 10.1016/j.envpol.2010.01.032, 2010a.
- 191 Fu, X. W., Feng, X. B., and Wang, S. F.: Exchange fluxes of Hg between surfaces and atmosphere in  
192 the eastern flank of Mount Gongga, Sichuan province, southwestern China, *J Geophys Res-Atmos*, 113,  
193 Artn D20306  
194 Doi 10.1029/2008jd009814, 2008.
- 195 Fu, X. W., Feng, X., Dong, Z. Q., Yin, R. S., Wang, J. X., Yang, Z. R., and Zhang, H.: Atmospheric  
196 gaseous elemental mercury (GEM) concentrations and mercury depositions at a high-altitude mountain  
197 peak in south China, *Atmos Chem Phys*, 10, 2425-2437, 2010b.
- 198 Fu, X. W., Feng, X. B., Zhang, H., Yu, B., and Chen, L. G.: Mercury emissions from natural surfaces  
199 highly impacted by human activities in Guangzhou province, South China, *Atmos Environ*, 54,  
200 185-193, DOI 10.1016/j.atmosenv.2012.02.008, 2012.



201 Garratt, J. R.: The atmospheric boundary layer, Cambridge University Press, Cambridge, UK, 1992.

202 Grigal, D. F., Kolka, R. K., Fleck, J. A., and Nater, E. A.: Mercury budget of an upland-peatland  
203 watershed, *Biogeochemistry*, 50, 95-109, Doi 10.1023/A:1006322705566, 2000.

204 Huang, H. Y., Hall, A., and Teixeira, J.: Evaluation of the WRF PBL Parameterizations for Marine  
205 Boundary Layer Clouds: Cumulus and Stratocumulus, *Mon Weather Rev*, 141, 2265-2271,  
206 10.1175/Mwr-D-12-00292.1, 2013.

207 Iverfeldt, A.: Mercury in forest canopy throughfall water and its relation to atmospheric deposition,  
208 *Water Air Soil Poll*, 56, 553-564, Doi 10.1007/Bf00342299, 1991.

209 Juillerat, J. I., Ross, D. S., and Bank, M. S.: Mercury in litterfall and upper soil horizons in forested  
210 ecosystems in Vermont, USA, *Environ Toxicol Chem*, 31, 1720-1729, Doi 10.1002/Etc.1896, 2012.

211 Kaimal, J. C., and Finnigan, J. J.: Atmospheric Boundary Layer Flows, Oxford University Press, New  
212 York, Oxford, 1994.

213 Krogsaeter, O., and Reuder, J.: Validation of boundary layer parameterization schemes in the Weather  
214 Research and Forecasting (WRF) model under the aspect of offshore wind energy applicationspart II:  
215 boundary layer height and atmospheric stability, *Wind Energy*, 18, 1291-1302, 10.1002/we.1765, 2015.

216 Kuiken, T., Gustin, M., Zhang, H., Lindberg, S., and Sedinger, B.: Mercury emission from terrestrial  
217 background surfaces in the eastern USA. II: Air/surface exchange of mercury within forests from South  
218 Carolina to New England, *Appl Geochem*, 23, 356-368, DOI 10.1016/j.apgeochem.2007.12.007,  
219 2008a.

220 Kuiken, T., Zhang, H., Gustin, M., and Lindberg, S.: Mercury emission from terrestrial background  
221 surfaces in the eastern USA. Part I: Air/surface exchange of mercury within a southeastern deciduous  
222 forest (Tennessee) over one year, *Appl Geochem*, 23, 345-355, DOI 10.1016/j.apgeochem.2007.12.006,  
223 2008b.

224 Larssen, T., de Wit, H. A., Wiker, M., and Halse, K.: Mercury budget of a small forested boreal  
225 catchment in southeast Norway, *Sci Total Environ*, 404, 290-296, DOI 10.1016/j.scitotenv.2008.03.013,  
226 2008.

227 Lee, Y. H., Bishop, K. H., and Munthe, J.: Do concepts about catchment cycling of methylmercury and  
228 mercury in boreal catchments stand the test of time? Six years of atmospheric inputs and runoff export  
229 at Svartberget, northern Sweden, *Sci Total Environ*, 260, 11-20, Doi 10.1016/S0048-9697(00)00538-6,  
230 2000.

231 Lindberg, S., Bullock, R., Ebinghaus, R., Engstrom, D., Feng, X. B., Fitzgerald, W., Pirrone, N.,  
232 Prestbo, E., and Seigneur, C.: A synthesis of progress and uncertainties in attributing the sources of  
233 mercury in deposition, *Ambio*, 36, 19-32, 2007.

234 Lindberg, S. E.: Forests and the global biogeochemical cycle of mercury: The importance of  
235 understanding air/vegetation exchange processes, *Nato Asi* 2, 21, 359-380, 1996.

236 Lindberg, S. E., Hanson, P. J., Meyers, T. P., and Kim, K. H.: Air/surface exchange of mercury vapor  
237 over forests - The need for a reassessment of continental biogenic emissions, *Atmos Environ*, 32,  
238 895-908, Doi 10.1016/S1352-2310(97)00173-8, 1998.

239 Mélières, M. A., Pourchet, M., Charles-Dominique, P., and Gaucher, P.: Mercury in canopy leaves of  
240 French Guiana in remote areas, *Sci Total Environ*, 311, 261-267, Doi 10.1016/S0048-9697(03)00142-6,  
241 2003.

242 Ma, M., Wang, D. Y., Sun, R. G., Shen, Y. Y., and Huang, L. X.: Gaseous mercury emissions from  
243 subtropical forested and open field soils in a national nature reserve, southwest China, *Atmos Environ*,  
244 64, 116-123, DOI 10.1016/j.atmosenv.2012.09.038, 2013.

245 Munthe, J., Hultberg, H., and Iverfeldt, A.: Mechanisms of Deposition of Methylmercury and Mercury  
246 to Coniferous Forests, *Water Air Soil Poll*, 80, 363-371, Doi 10.1007/Bf01189686, 1995.

247 Nacht, D. M., and Gustin, M. S.: Mercury emissions from background and altered geologic units  
248 throughout Nevada, *Water Air Soil Poll*, 151, 179-193, Doi 10.1023/B:Wate.0000009907.49577.A8,  
249 2004.

250 Poissant, L., and Casimir, A.: Water-air and soil-air exchange rate of total gaseous mercury measured at  
251 background sites, *Atmos Environ*, 32, 883-893, Doi 10.1016/S1352-2310(97)00132-5, 1998.

252 Raupach, M. R.: Simplified Expressions for Vegetation Roughness Length and Zero-Plane  
253 Displacement as Functions of Canopy Height and Area Index, *Bound-Lay Meteorol*, 71, 211-216, Doi  
254 10.1007/Bf00709229, 1994.

255 Rea, A. W., Keeler, G. J., and Scherbatskoy, T.: The deposition of mercury in throughfall and litterfall  
256 in the lake champlain watershed: A short-term study, *Atmos Environ*, 30, 3257-3263, Doi  
257 10.1016/1352-2310(96)00087-8, 1996.

258 Risch, M. R., DeWild, J. F., Krabbenhoft, D. P., Kolka, R. K., and Zhang, L. M.: Litterfall mercury dry  
259 deposition in the eastern USA, *Environ Pollut*, 161, 284-290, DOI 10.1016/j.envpol.2011.06.005, 2012.

260 Roulet, M., Lucotte, M., Saint-Aubin, A., Tran, S., Rheault, I., Farella, N., Da Silva, E. D., Dezencourt,  
261 J., Passos, C. J. S., Soares, G. S., Guimaraes, J. R. D., Mergler, D., and Amorim, M.: The geochemistry  
262 of mercury in central Amazonian soils developed on the Alter-do-Chao formation of the lower Tapajos  
263 River Valley, Para state, Brazil, *Sci Total Environ*, 223, 1-24, Doi 10.1016/S0048-9697(98)00265-4,  
264 1998.

265 Schroeder, W. H., Munthe, J., and Lindqvist, O.: Cycling of Mercury between Water, Air, and Soil  
266 Compartments of the Environment, *Water Air Soil Poll*, 48, 337-347, 1989.

267 Schroeder, W. H., Beauchamp, S., Edwards, G., Poissant, L., Rasmussen, P., Tordon, R., Dias, G.,  
268 Kemp, J., Van Heyst, B., and Banic, C. M.: Gaseous mercury emissions from natural sources in  
269 Canadian landscapes, *J Geophys Res-Atmos*, 110, Artn D18302  
270 Doi 10.1029/2004jd005699, 2005.

271 Schwesig, D., and Matzner, E.: Pools and fluxes of mercury and methylmercury in two forested  
272 catchments in Germany, *Sci Total Environ*, 260, 213-223, Doi 10.1016/S0048-9697(00)00565-9, 2000.

273 Sheehan, K. D., Fernandez, I. J., Kahl, J. S., and Amirbahman, A.: Litterfall mercury in two forested  
274 watersheds at Acadia National Park, Maine, USA, *Water Air Soil Poll*, 170, 249-265, DOI  
275 10.1007/s11270-006-3034-y, 2006.

276 Shi, T. T., Guan, D. X., Wang, A. Z., Wu, J. B., Jin, C. J., and Han, S. J.: Comparison of three models to  
277 estimate evapotranspiration for a temperate mixed forest, *Hydrol Process*, 22, 3431-3443,  
278 10.1002/hyp.6922, 2008.

279 Silva-Filho, E. V., Machado, W., Oliveira, R. R., Sella, S. M., and Lacerda, L. D.: Mercury deposition  
280 through litterfall in an Atlantic Forest at Ilha Grande, southeast Brazil, *Chemosphere*, 65, 2477-2484,  
281 DOI 10.1016/j.chemosphere.2006.04.053, 2006.

282 Simpson, I. J., Thurtell, G. W., Neumann, H. H., Den Hartog, G., and Edwards, G. C.: The validity of  
283 similarity theory in the roughness sublayer above forests, *Bound-Lay Meteorol*, 87, 69-99, Doi  
284 10.1023/A:1000809902980, 1998.

285 St Louis, V. L., Rudd, J. W. M., Kelly, C. A., Hall, B. D., Rolfhus, K. R., Scott, K. J., Lindberg, S. E.,  
286 and Dong, W.: Importance of the forest canopy to fluxes of methyl mercury and total mercury to boreal  
287 ecosystems, *Environmental Science & Technology*, 35, 3089-3098, Doi 10.1021/Es001924p, 2001.

288 Teixeira, D. C., Montezuma, R. C., Oliveira, R. R., and Silva, E. V.: Litterfall mercury deposition in

289 Atlantic forest ecosystem from SE - Brazil, *Environ Pollut*, 164, 11-15, DOI  
290 10.1016/j.envpol.2011.10.032, 2012.

291 Wan, Q., Feng, X. B., Lu, J., Zheng, W., Song, X. J., Li, P., Han, S. J., and Xu, H.: Atmospheric  
292 mercury in Changbai Mountain area, northeastern China II. The distribution of reactive gaseous  
293 mercury and particulate mercury and mercury deposition fluxes, *Environ Res*, 109, 721-727, DOI  
294 10.1016/j.envres.2009.05.006, 2009.

295 Wang, D. Y., He, L., Shi, X. J., Wei, S. Q., and Feng, X. B.: Release flux of mercury from different  
296 environmental surfaces in Chongqing, China, *Chemosphere*, 64, 1845-1854, DOI  
297 10.1016/j.chemosphere.2006.01.054, 2006.

298 Wang, Z. W., Zhang, X. S., Xiao, J. S., Zhijia, C., and Yu, P. Z.: Mercury fluxes and pools in three  
299 subtropical forested catchments, southwest China, *Environ Pollut*, 157, 801-808, DOI  
300 10.1016/j.envpol.2008.11.018, 2009.

301 Xiao, Z. F., Munthe, J., Schroeder, W. H., and Lindqvist, O.: Vertical Fluxes of Volatile Mercury over  
302 Forest Soil and Lake Surfaces in Sweden, *Tellus B*, 43, 267-279, DOI  
303 10.1034/j.1600-0889.1990.t01-1-00009.x-i1, 1991.

304 Zhang, H., Lindberg, S. E., Marsik, F. J., and Keeler, G. J.: Mercury air/surface exchange kinetics of  
305 background soils of the Tahquamenon River watershed in the Michigan Upper Peninsula, *Water Air  
306 Soil Poll*, 126, 151-169, Doi 10.1023/A:1005227802306, 2001.

307 Zhou, J., Feng, X. B., Liu, H. Y., Zhang, H., Fu, X. W., Bao, Z. D., Wang, X., and Zhang, Y. P.:  
308 Examination of total mercury inputs by precipitation and litterfall in a remote upland forest of  
309 Southwestern China, *Atmos Environ*, 81, 364-372, DOI 10.1016/j.atmosenv.2013.09.010, 2013.

310
